# Supplementary material for: Armoring a liposome-integrated tissue factor with sacrificial CaCO3 to form potent self-propelled hemostats
Source: Royal Society of Chemistry journal article supplement (doi:10.1039/d2tb02140d), 2023-01-01
Supplement: d2tb02140d1.pdf [file d2tb02140d1.pdf]

## Supporting Information

### **Armoring liposome-integrated tissue factor with sacrificial CaCO<sub>3</sub> to form potent self-propelled hemostats**

Chengkun Liu<sup>1</sup>, Zhuang Shi<sup>1</sup>, Jingyan Zhu<sup>1</sup>, Chang Liu<sup>1</sup>, Xiaodan Liu<sup>1</sup>, Naseer Ullah  
Khan<sup>1</sup>, Shihai Liu<sup>2</sup>, Xiaojuan Wang<sup>1</sup>, Xiaoqiang Wang<sup>1,\*</sup>, Fang Huang<sup>1,\*</sup>

<sup>1</sup>State Key Laboratory of Heavy Oil Processing & College of Chemistry and  
Chemical Engineering, China University of Petroleum (East China), 66 West  
Changjiang Road, Qingdao, Shandong 266580, China

<sup>2</sup>Medical Research Center, the Affiliated Hospital of Qingdao University, Qingdao,  
Shandong 266550, China

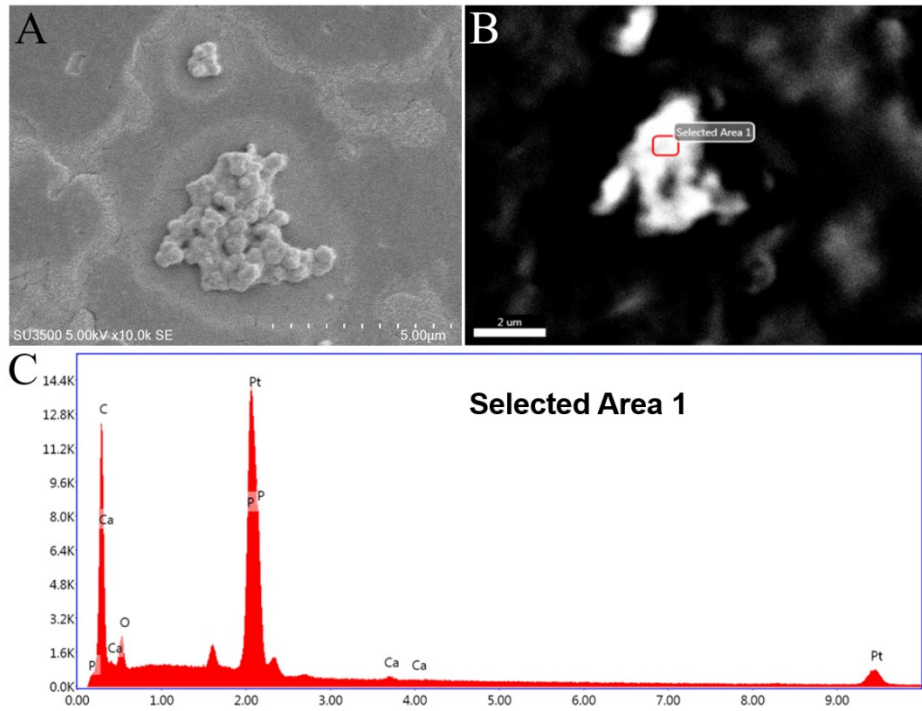

**Figure S1** SEM micrograph (A) and the corresponding secondary electron micrograph (B) of TF-liposome-loaded  $\text{CaCO}_3$  particles. (C) EDX spectrum of the selected area in (B).

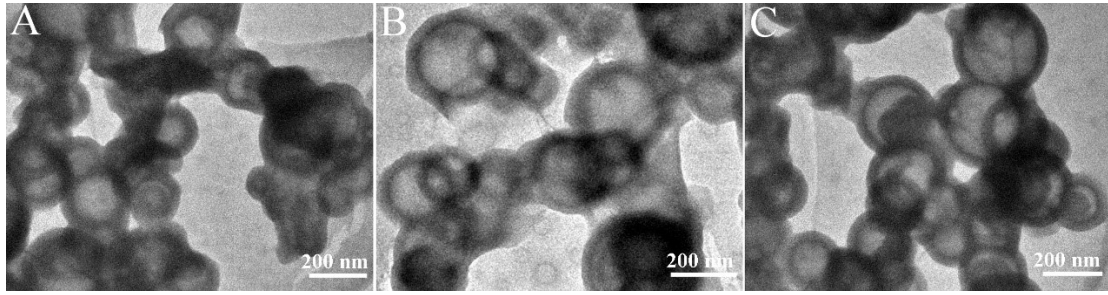

**Figure S2** STEM micrographs of mineralized TF-liposomes dried under different conditions: (A) 60 °C; (B) 90 °C; (C) Freeze-drying.

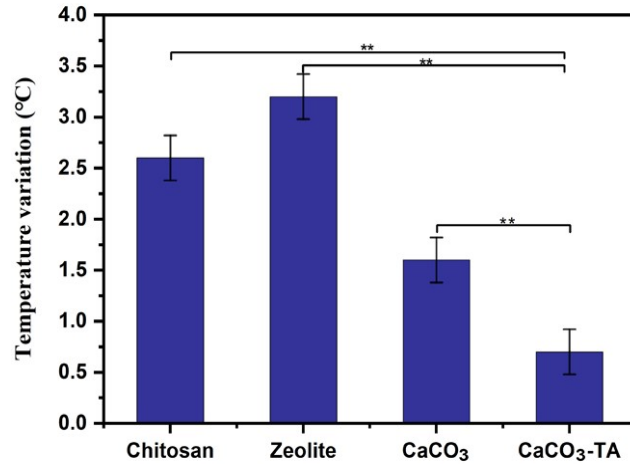

**Figure S3** Temperature changes generated by different exothermic hydration reactions. 100 mg of each of chitosan, zeolite, TF-liposome-loaded CaCO<sub>3</sub> and TF-liposome-loaded CaCO<sub>3</sub> plus TA was mixed with 1.5 g of water at room temperature, and the resultant temperature variation was recorded using a digital thermometer. Values represent mean  $\pm$  s.d. (n = 3 independent samples).  $**P \leq 0.01$  among the marked groups using a one-tailed analysis of variance.

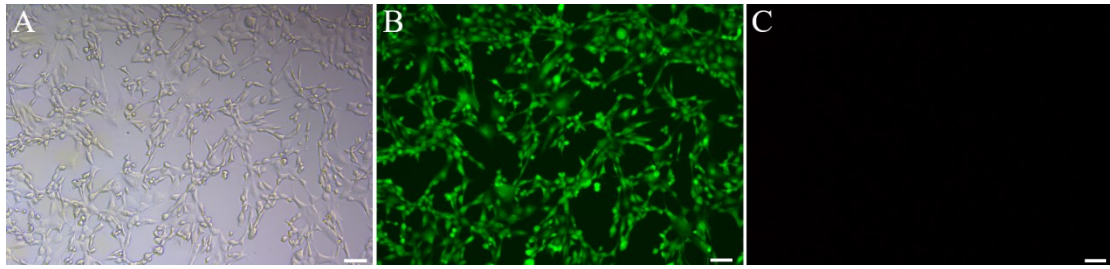

**Figure S4** Evaluation of TF-liposome-loaded  $\text{CaCO}_3$  cytotoxicity using the live/dead assay. (A) bright-field image; (B) live cells fluoresced green against dead cells, which fluoresce red (C). Scale bar, 50  $\mu\text{m}$ .

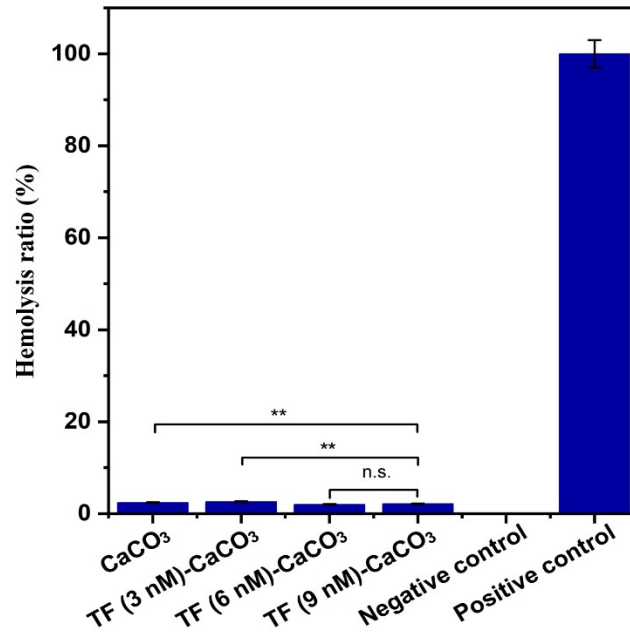

**Figure S5** Hemolysis ratio of the mixture of TA with pure CaCO<sub>3</sub> or TF-liposome-loaded CaCO<sub>3</sub>. Blood in PBS and deionized water served as negative and positive controls. Values represent mean  $\pm$  s.d. (n = 3 independent samples). n.s., no significance,  $**P \leq 0.01$  among the marked groups using a one-tailed analysis of variance.
